# Supplementary material
Source: publisher figshare collection journal article supplement (https://frontiersin.figshare.com/ndownloader/files/14548079)
Supplement: Supplementary file [file 14548079]

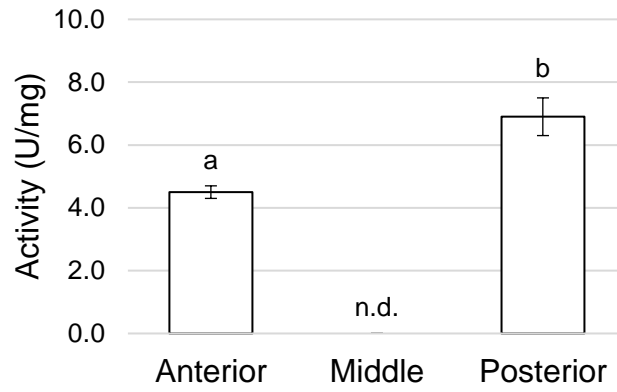

**Figure S2.** Lipase activity in the different midgut regions. The values are reported as mean  $\pm$  SEM of at least 4 experiments. In the middle midgut no activity was detectable (n.d.). Different letters denote significant differences (unpaired *t*-test: *p*-value<0.05).
